# Supplementary material
Source: PubMed Central journal article supplement (PMC9214163)
Supplement: awac045_supplementary_data.pdf [file awac045_supplementary_data.pdf]

# SUPPLEMENTARY MATERIAL

## Supplementary Methods

### 1. Neuropsychological test battery

In a subgroup of patients (n = 13) cognitive functions were examined with a 45-min cognitive battery consisting of six standardized neuropsychological tests. The test battery was administered by a trained neuropsychologist in an undisturbed environment in German (native) language. The neuropsychological test battery comprised the Hopkins Verbal Learning Test revised (HVLTR)<sup>1</sup>, Digit Span forward/reverse<sup>2</sup>, Trail Making Test part A and B<sup>3</sup>, Color-Word Interference Test (FWIT)<sup>4</sup>, the Symbol-Digit Modalities Test (SDMT)<sup>5</sup>, and a semantic and letter fluency test<sup>6</sup>. For each test, z-scores were calculated based on the respective mean and standard deviation, stratified by age and education<sup>7</sup>. For the Color-Word Interference Test (FWIT)<sup>4</sup>, which did not provide mean and standard deviation, percentile ranks or T-scores were transformed into z-scores. Results of n = 11 patients were previously reported<sup>8</sup>.

## Supplementary Results

### 1. Results of the Neuropsychological test battery

Detailed results are displayed in the **Supplementary Table 1**. The Digit Span backward was affected most frequently (6/13), followed by semantic fluency (5/12; both representing executive functions). Moreover, deficits were present in the Hopkins Verbal Learning Test revised (HVLTR; 5/12), representing the cognitive domain memory. Tests for attention were less frequently impaired. Overall, these findings confirmed the results from the MoCA.

### 2. Confirmatory analysis with AMICO-NODDI

To corroborate the results of our Bayesian model, we also extracted diffusivity parameters using the accelerated microstructure imaging via convex optimization (AMICO)-NODDI, a regularized version of NODDI that also allows fast processing times due to the linearization of fitting procedures (<https://github.com/daducci/AMICO>)<sup>9</sup>. From the parameters provided by the AMICO approach,  $V_{iso}$  can be considered as the homologue of V-CSF. In a comparison of whole-brain white matter  $V_{iso}$  parameters between COVID-19 patients and controls

(ANCOVAs controlling for “age” and “sex”), a highly significant increase ( $P < 0.001$ ; df: 51,  $t = -4.4$ ; Cohen’s  $d$ : -1.0) was present in COVID-19 similar to our V-CSF data. The distribution of standardized regression coefficients attained by voxel-wise comparisons (COVID-19 vs. controls, nuisance covariates “age”, “sex” and “tissue probability value”) also confirmed a widespread increase of  $V_{iso}$  (see **Supplementary Figure 1**) – although the frontoparietal maxima are a bit less clearly pronounced compared to V-CSF data. Using partial Pearson’s correlation approach controlling for sex and age, significant correlations could be detected between  $V_{iso}$  and MoCA-performance ( $r = -0.3$ ;  $P = 0.042$ ) as well as  $V_{iso}$  and the PES ( $r = 0.59$ ;  $P = 0.042$ ). For olfactory performance, no significant correlation was present ( $r = 0.16$ ;  $P = 0.6$ ). For interleukin-6, a statistically non-significant trend towards a correlation to V-CSF emerged ( $r = 0.47$ ;  $P = 0.078$ ).

## Supplementary Figures

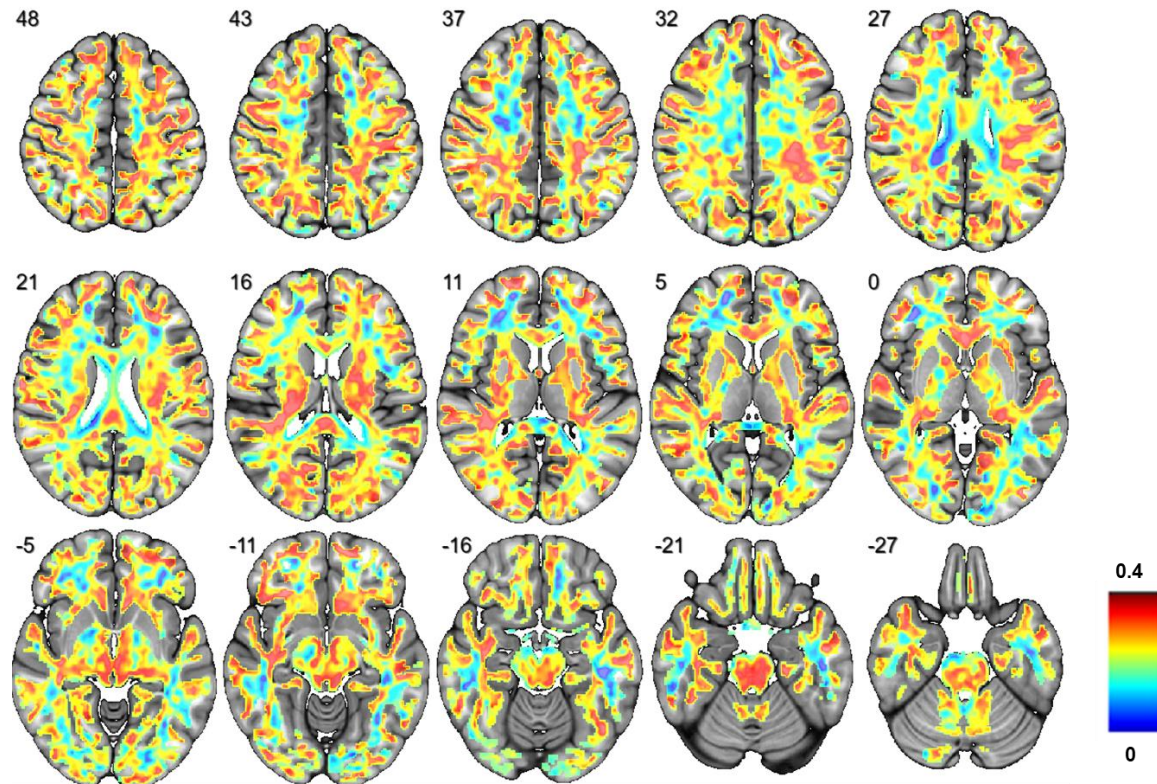

**Supplementary Figure 1.** The standardized regression coefficients of the factor  $V_{iso}$  were extracted from regression models attained by voxel-wise comparisons between COVID-19 patients and controls (with covariates “age”, “sex” and “tissue probability value”) and were superimposed onto a T1w MRI template. Color-coding indicates the coefficient values as a measure of effect size of the factor “COVID-19” on  $V_{iso}$  (hot colors: large effect size vs. cold colors: small effect size). Please note that all coefficients monodirectionally indicated an increase in  $V_{iso}$ . Radiological orientation, i.e. left image side corresponds to patient’s right body side; numbers denote the axial (z) position in millimetres.

## Supplementary Tables

| <b>Supplementary Table 1: Baseline characteristics of COVID-19-patients (n=20)</b> |                                  |
|------------------------------------------------------------------------------------|----------------------------------|
| <b>Baseline Characteristics</b>                                                    | <b>n (%) or mean (SD); range</b> |
| Body Mass Index (BMI)                                                              | 27.8 (4.5); 19.6 to 35.9         |
| Weight (kg)                                                                        | 81.7 (15.1); 53.7 to 112         |
| Height (cm)                                                                        | 171.6 (9.2); 150 to 183          |
| Systolic BP (mmHg) at discharge                                                    | 131.2 (10.5); 115 to 150         |
| Diastolic BP (mmHg) at discharge                                                   | 75.3 (12.7); 55 to 105           |
| Smoker status (current)                                                            | 2 (10%)                          |
| Alcohol consumption (> 3days/week)                                                 | 3 (15%)                          |

| <b>Supplementary Table 2: Characteristics of healthy controls (n=35)</b> |                                  |
|--------------------------------------------------------------------------|----------------------------------|
| <b>Demographic data</b>                                                  | <b>n (%) or mean (SD); range</b> |
| Age (years)                                                              | 51.8 (17.3); 21 to 81            |
| Sex (male / female)                                                      | 18 (51) / 17 (49)                |
| <b>Baseline Characteristics</b>                                          | <b>n (%) or mean (SD); range</b> |
| Body Mass Index (BMI)                                                    | 24.8 (2.6); 20.8 to 30.6         |
| Smoker status (current)                                                  | 1 (3%)                           |
| Alcohol consumption (> 3days/week)                                       | 0 (0%)                           |
| <b>Comorbidities</b>                                                     | <b>n (%)</b>                     |
| Bronchial asthma                                                         | 2 (6%)                           |
| Coronary heart disease                                                   | 1 (3%)                           |
| Deep vein thrombosis                                                     | 1 (3%)                           |
| Malignancies                                                             | 4 (12%)                          |
| <b>Clinical readouts</b>                                                 | <b>mean (SD); range</b>          |
| MoCA sum score (corrected for years of education)                        | 28.3 (1.5); 26 to 30             |

**Supplementary Table 3:** Detailed results of the neurocognitive test battery (n = 13); n = 11 are a subsample of previously published patients<sup>8</sup>

| Test                                                            | Domain             | Outcome Variable | Mean Z-Score $\pm$ SD           | N (%) $\leq$ -1,5 SD |
|-----------------------------------------------------------------|--------------------|------------------|---------------------------------|----------------------|
| Hopkins Verbal Learning Test revised (HVLTR): learning (n = 12) | Verbal Memory      | Scores           | -1.01 $\pm$ 1.39 [-3.22 – 1.10] | 5 (42 %)             |
| HVLTR: delayed recall (n = 12)                                  | Verbal Memory      | Scores           | -0.58 $\pm$ 0.94 [-2.01 – 0.58] | 3 (25 %)             |
| HVLTR: recognition discrimination index (n = 12)                | Verbal Memory      | Scores           | -0.17 $\pm$ 1.11 [-2.49 – 0.81] | 2 (17 %)             |
| Color-Word Interference reading (n = 12)                        | Processing Speed   | Time (s)         | -0.57 $\pm$ 1.24 [-2.60 – 1.60] | 4 (33 %)             |
| Color-Word Interference: naming (n = 12)                        | Processing Speed   | Time (s)         | -0.32 $\pm$ 1.16 [-1.90 – 1.70] | 2 (17 %)             |
| Symbol-Digits-Modalities Test (n = 12)                          | Processing Speed   | Time (s)         | -0.76 $\pm$ 1.14 [-2.54 – 0.90] | 3 (25 %)             |
| Trail Making Test A (n = 13)                                    | Attention          | Time (s)         | -0.05 $\pm$ 0.93 [-1.57 – 1.30] | 1 (8 %)              |
| Digit Span forward (n = 13)                                     | Attention          | Score            | 0.07 $\pm$ 1.19 [-1.81 – 2.51]  | 2 (15 %)             |
| Digit Span backward (n = 13)                                    | Executive function | Score            | -1.29 $\pm$ 1.19 [-1.81 – 2.15] | 6 (46 %)             |
| Semantic fluency (n = 12)                                       | Executive function | Score            | -0.85 $\pm$ 1.27 [-2.79 – 1.05] | 5 (42 %)             |
| Phonemic fluency (n = 12)                                       | Executive function | Score            | -0.22 $\pm$ 1.14 [-1.87 – 1.50] | 2 (17 %)             |
| Color-Word Interference: interference (n = 12)                  | Executive function | Time (s)         | -0.21 $\pm$ 1.07 [-2.40 – 1.20] | 2 (17 %)             |
| Trail Making Test B (n = 13)                                    | Executive function | Time (s)         | -0.29 $\pm$ 1.06 [-1.81 – 1.45] | 2 (15 %)             |

# References

1. Brandt J, Benedict R. Hopkins verbal learning test – Revised. Administration manual. Lutz, FL: Psychological Assessment Resources. Published online 2001.
2. Lepach A, Petermann F. Wechsler Memory Scale Revised (WMS-R). Published online 2012.
3. Lezak MD. *Neuropsychological Assessment*. 3rd ed. Oxford University Press; 1995.
4. Bäumler, G. Farbe-Wort-Interferenztest (FWIT) nach J.R. Stroop. Published online 1985.
5. Langdon DW, Amato MP, Boringa J, et al. Recommendations for a Brief International Cognitive Assessment for Multiple Sclerosis (BICAMS). *Mult Scler*. 2012;18(6):891-898. doi:10.1177/1352458511431076
6. Aebi C, Monsch AU, Berres M, Brubacher D, Staehelin HB. Validation of the German CERAD-neuropsychological assessment battery. Published online 2002.
7. Lazar RM, Pavol MA, Bormann T, et al. Neurocognition and Cerebral Lesion Burden in High-Risk Patients Before Undergoing Transcatheter Aortic Valve Replacement. *JACC: Cardiovascular Interventions*. 2018;11(4):384-392. doi:10.1016/j.jcin.2017.10.041
8. Hosp JA, Dressing A, Blazhenets G, et al. Cognitive impairment and altered cerebral glucose metabolism in the subacute stage of COVID-19. *Brain*. Published online April 3, 2021. doi:10.1093/brain/awab009
9. Daducci A, Canales-Rodríguez EJ, Zhang H, Dyrby TB, Alexander DC, Thiran JP. Accelerated Microstructure Imaging via Convex Optimization (AMICO) from diffusion MRI data. *NeuroImage*. 2015;105:32-44. doi:10.1016/j.neuroimage.2014.10.026
10. Reisert M, Kellner E, Dhital B, Hennig J, Kiselev VG. Disentangling micro from mesostructure by diffusion MRI: A Bayesian approach. *Neuroimage*. 2017;147:964-975. doi:10.1016/j.neuroimage.2016.09.058
